# Supplementary material for: Effects of Lewis Basicity and Acidity on σ-Hole Interactions in Carbon-Bearing Complexes: A Comparative Ab Initio Study
Source: MDPI journal article supplement (doi:10.3390/ijms232113023), 2022-10-27
Supplement: s1 [file s1]

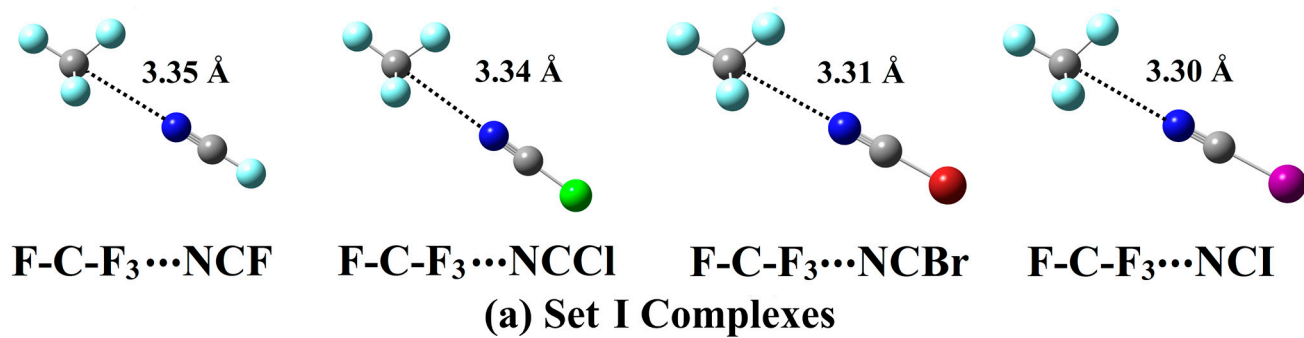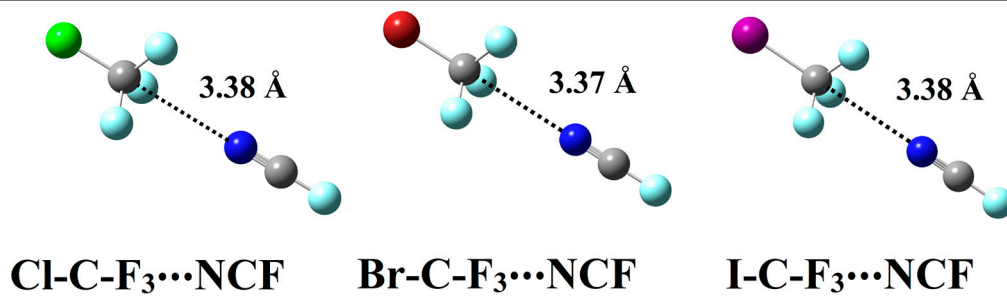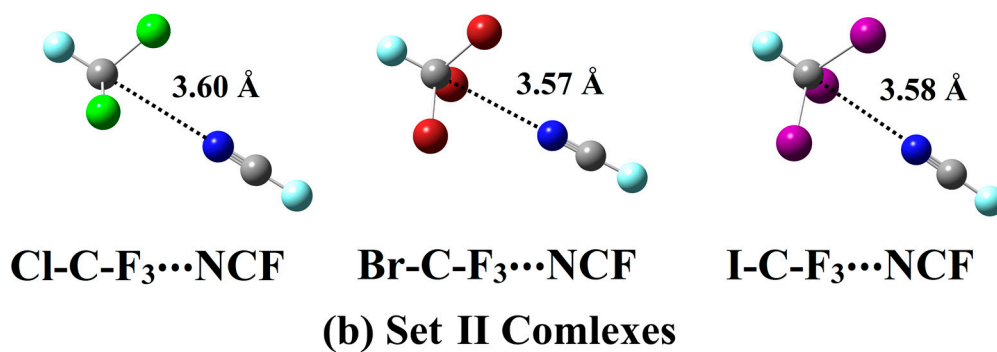

**Figure S1.** (a) Set I and (b) Set II complexes elucidating the Lewis basicity and acidity effects, respectively. The C...N distances are evaluated in Å.

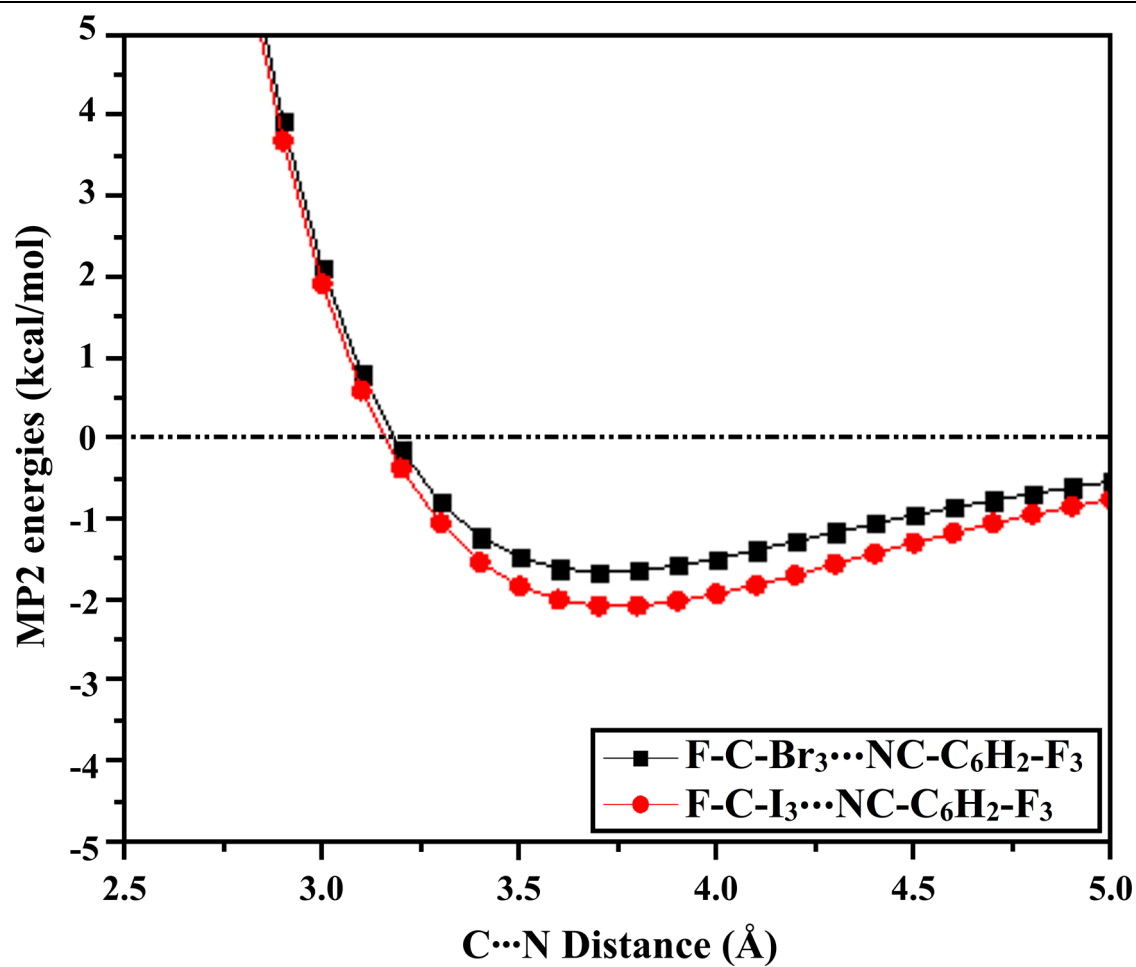

**Figure S2.** MP2 energies for the F-C-Br<sub>3</sub>/ F-C-I<sub>3</sub>...NC-C<sub>6</sub>H<sub>2</sub>-F<sub>3</sub> complexes. The C...N distances are evaluated in Å.

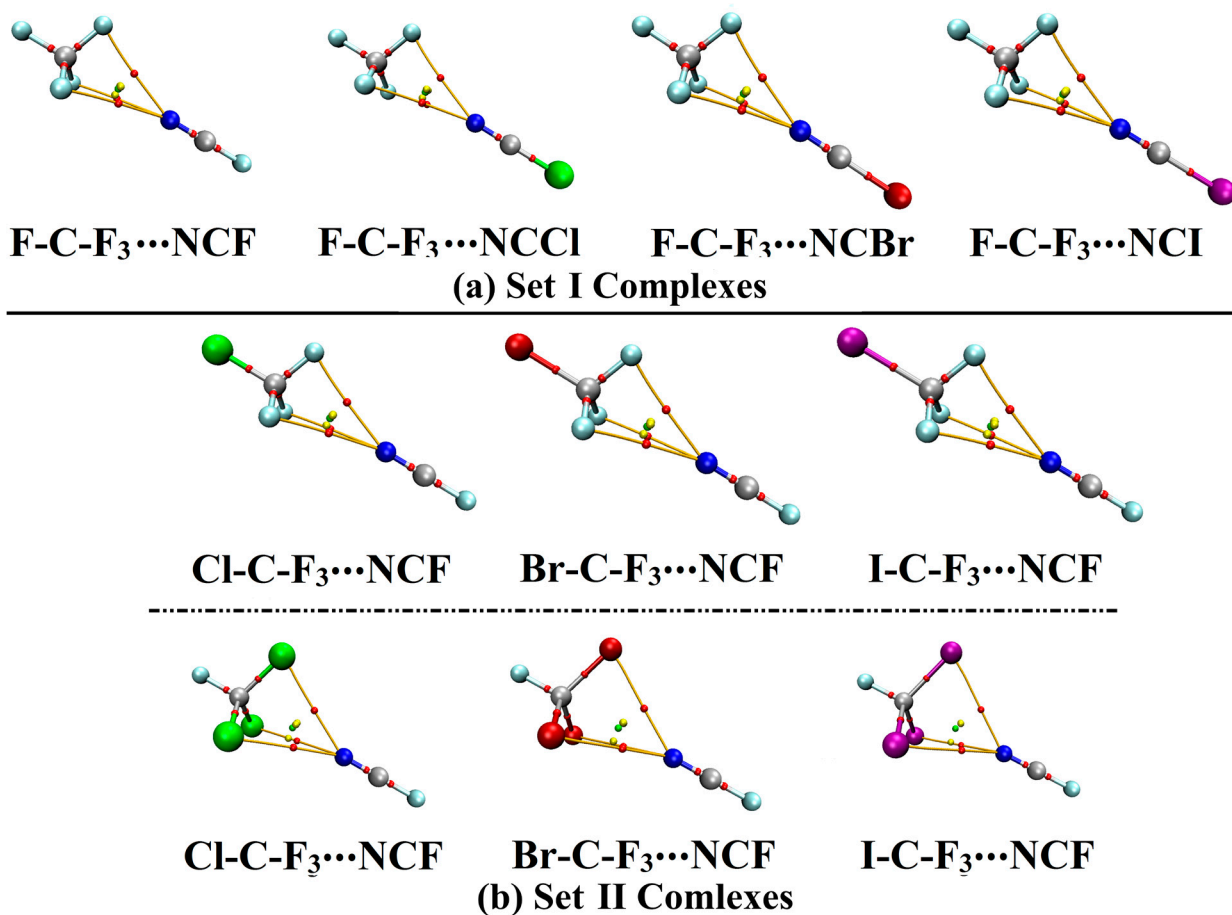

**Figure S3.** QTAIM diagrams of (a) Set I and (b) Set II complexes. Red dots point out the BCPs locations within the interacting species.

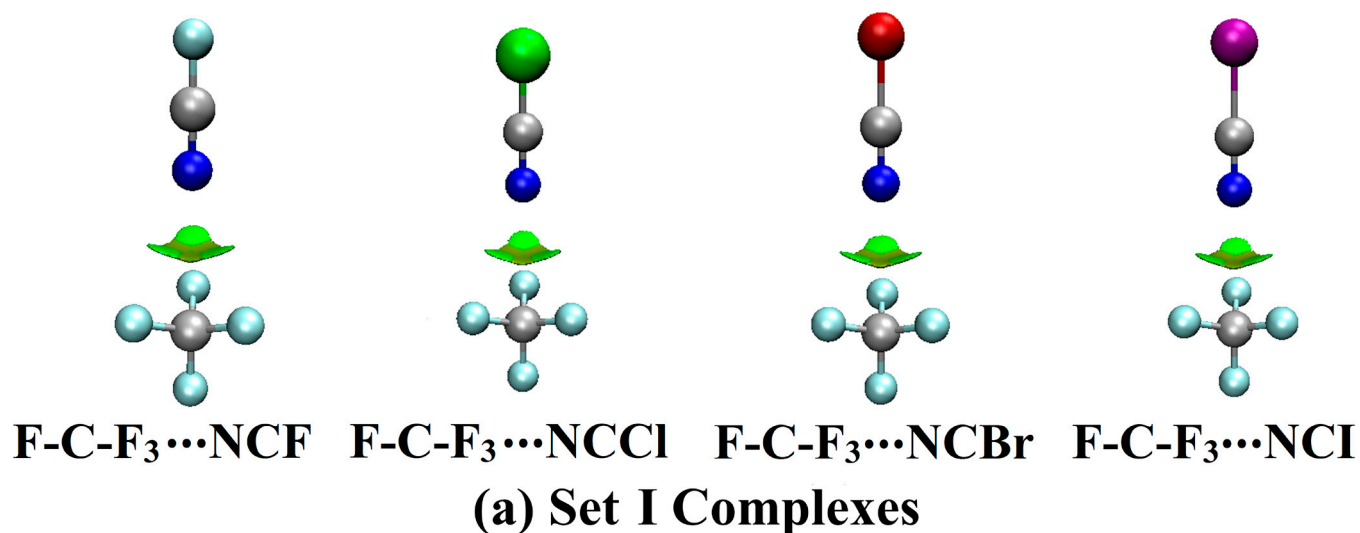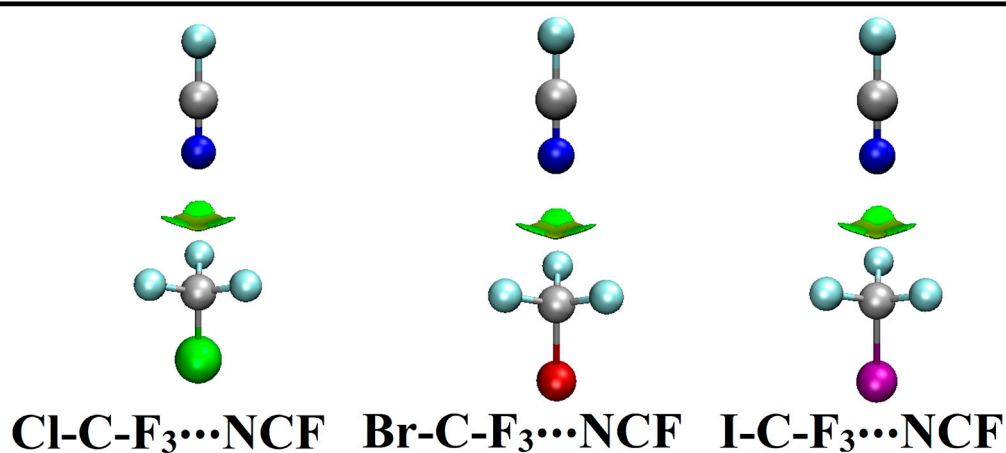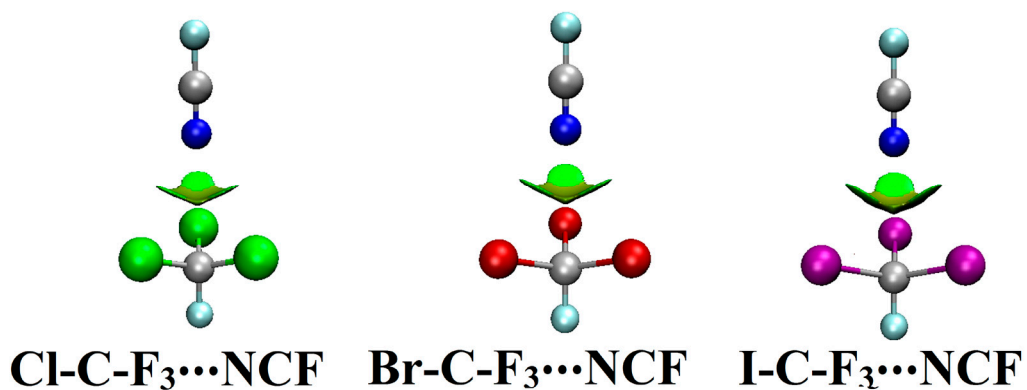

**(b) Set II Complexes**

**Figure S4.** 3D NCI plots of the (a) Set I complexes and (b) Set II complexes. The color scope extended based on the  $\text{sign}(\lambda_2)\rho$  from  $-0.035$  to  $0.020$  au (blue to red), where  $\rho$  represents the electron density and  $\lambda_2$  refers to the second eigenvalue of the Hessian matrix based on the  $\text{sign}(\lambda_2)\rho$ .

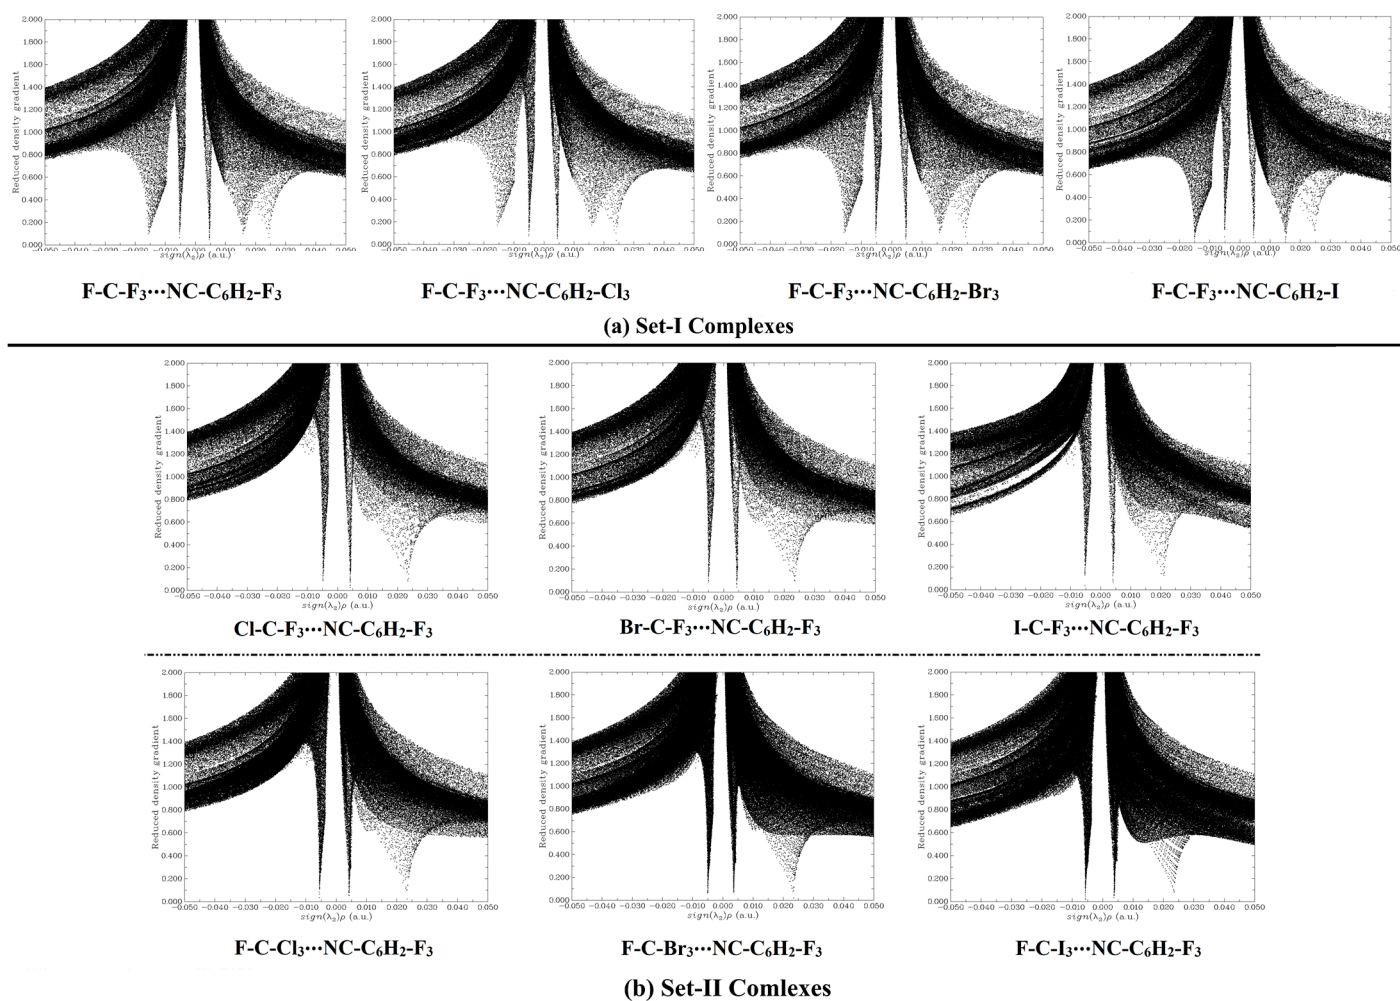

**Figure S5.** 2D noncovalent interaction (NCI) reduced density gradient (RDG) plots for the (a) Set I complexes and (b) Set II complexes.

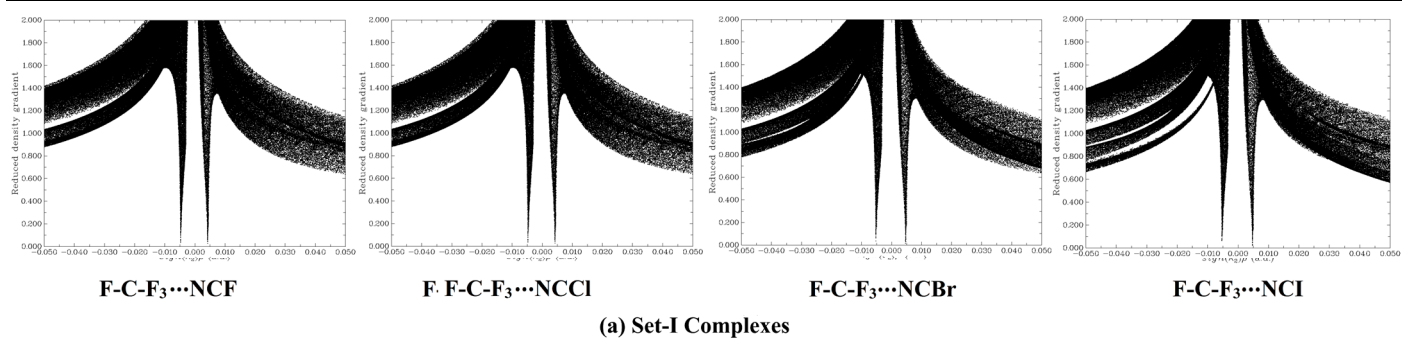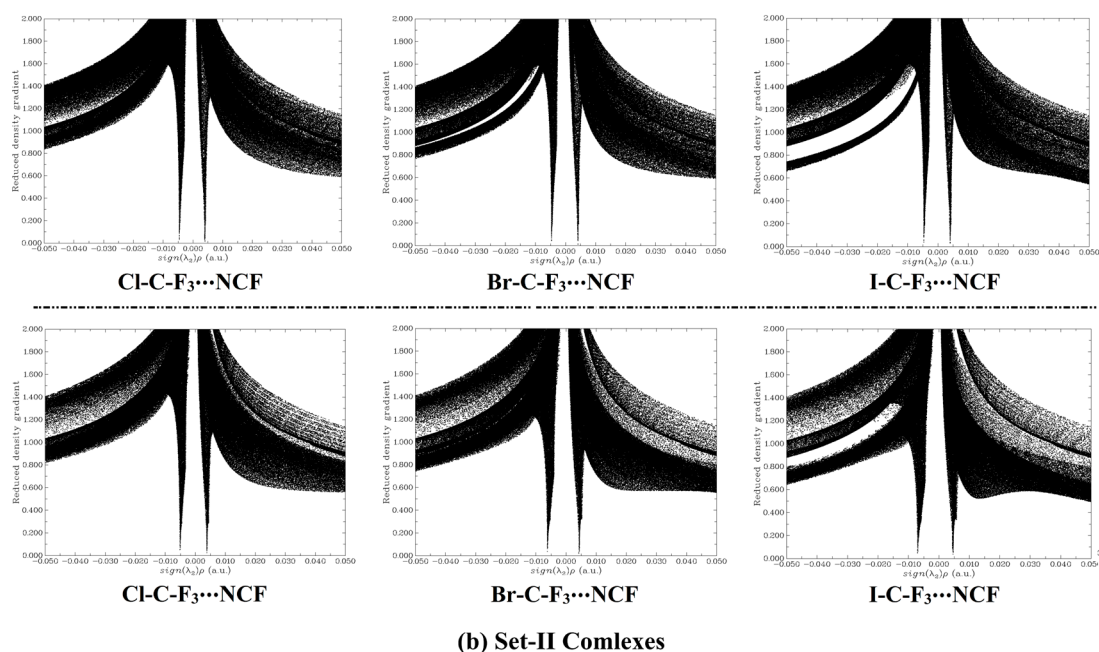

**Figure S6.** 2D noncovalent interaction (NCI) reduced density gradient (RDG) plots for the (a) Set I complexes and (b) Set II complexes.

**Table S1.**  $E_{\text{elst}}$ ,  $E_{\text{ind}}$ ,  $E_{\text{disp}}$ , and  $E_{\text{exch}}$ , along with total  $E_{\text{SAPT2+(3)dMP2}}$  (in kcal/mol) of the F-C-F<sub>3</sub>...NC-C<sub>6</sub>H<sub>2</sub>-X<sub>3</sub>/NCX and W-C-F<sub>3</sub>/F-C-X<sub>3</sub>...NC-C<sub>6</sub>H<sub>2</sub>-F<sub>3</sub>/NCF complexes.

| W/X | Complexation parameters                                                |                    |                    |                   |                                       | Complexation parameters   |                  |                   |                   |                                       |
|-----|------------------------------------------------------------------------|--------------------|--------------------|-------------------|---------------------------------------|---------------------------|------------------|-------------------|-------------------|---------------------------------------|
|     | $E_{\text{elst}}$                                                      | $E_{\text{ind}}$   | $E_{\text{disp}}$  | $E_{\text{exch}}$ | $E_{\text{SAPT2+(3)dMP2}}^{\text{a}}$ | $E_{\text{elst}}$         | $E_{\text{ind}}$ | $E_{\text{disp}}$ | $E_{\text{exch}}$ | $E_{\text{SAPT2+(3)dMP2}}^{\text{a}}$ |
|     | F-C-F <sub>3</sub> ...NC-C <sub>6</sub> H <sub>2</sub> -X <sub>3</sub> |                    |                    |                   |                                       | F-C-F <sub>3</sub> ...NCX |                  |                   |                   |                                       |
| F   | -1.49                                                                  | -0.05              | -1.93              | 2.20              | -1.28                                 | -1.26                     | -0.03            | -1.73             | 1.91              | -1.10                                 |
| Cl  | -1.51                                                                  | -0.05              | -1.96              | 2.22              | -1.30                                 | -1.37                     | -0.03            | -1.83             | 1.91              | -1.18                                 |
| Br  | -1.59                                                                  | -0.06              | -2.03              | 2.38              | -1.30                                 | -1.52                     | -0.03            | -1.97             | 2.05              | -1.19                                 |
| I   | -1.55                                                                  | -0.06              | -2.00              | 2.28              | -1.33                                 | -1.57                     | -0.04            | -2.01             | 2.34              | -1.22                                 |
|     | W-C-F <sub>3</sub> ...NC-C <sub>6</sub> H <sub>2</sub> -F <sub>3</sub> |                    |                    |                   |                                       | W-C-F <sub>3</sub> ...NCF |                  |                   |                   |                                       |
| F   | -1.49                                                                  | -0.05              | -1.93              | 2.20              | -1.28                                 | -1.26                     | -0.03            | -1.73             | 1.91              | -1.10                                 |
| Cl  | -1.14                                                                  | -0.06              | -1.97              | 2.08              | -1.10                                 | -0.95                     | -0.03            | -1.74             | 1.81              | -0.92                                 |
| Br  | -1.15                                                                  | -0.07              | -2.07              | 2.21              | -1.08                                 | -0.95                     | -0.04            | -1.81             | 1.90              | -0.90                                 |
| I   | -1.00                                                                  | -0.08              | -2.12              | 2.25              | -0.95                                 | -0.80                     | -0.05            | -1.84             | 1.90              | -0.79                                 |
|     | F-C-X <sub>3</sub> ...NC-C <sub>6</sub> H <sub>2</sub> -F <sub>3</sub> |                    |                    |                   |                                       | F-C-X <sub>3</sub> ...NCF |                  |                   |                   |                                       |
| F   | -1.49                                                                  | -0.05              | -1.93              | 2.20              | -1.28                                 | -1.26                     | -0.03            | -1.73             | 1.91              | -1.10                                 |
| Cl  | -1.35                                                                  | -0.28              | -3.52              | 3.88              | -1.27                                 | -1.09                     | -0.20            | -3.00             | 3.23              | -1.05                                 |
| Br  | -0.99 <sup>b</sup>                                                     | -0.40 <sup>b</sup> | -3.64 <sup>b</sup> | 3.59 <sup>b</sup> | -1.43 <sup>b</sup>                    | -1.59                     | -0.42            | -4.01             | 5.03              | -0.99                                 |
| I   | -1.73 <sup>b</sup>                                                     | -0.71 <sup>b</sup> | -4.79 <sup>b</sup> | 5.44 <sup>b</sup> | -1.79 <sup>b</sup>                    | -2.66                     | -0.78            | -5.24             | 7.53              | -1.15                                 |

<sup>a</sup> $E_{\text{SAPT2+(3)dMP2}} = E_{\text{elst}} + E_{\text{ind}} + E_{\text{disp}} + E_{\text{exch}}$ .<sup>b</sup>The SAPT results were recorded based on the PES scan depicted in Figure S2.

For Set I Complexes:

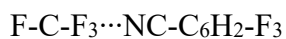

Molecule Name

18 17

SMALL

NO\_CHARGES

@<TRIPOS>ATOM

|        |         |         |           |
|--------|---------|---------|-----------|
| 1 C1   | -1.2167 | -0.3117 | 0.0109 C  |
| 2 F2   | -0.7776 | 0.3101  | -1.0665 F |
| 3 F3   | -0.7685 | -1.5523 | 0.0273 F  |
| 4 F4   | -0.7726 | 0.3234  | 1.0886 F  |
| 5 F5   | -2.5358 | -0.3105 | 0.0238 F  |
| 6 N6   | -2.3306 | -1.9038 | -2.6864 N |
| 7 C7   | -2.7211 | -2.4609 | -3.6432 C |
| 8 C8   | -3.1957 | -3.1387 | -4.8082 C |
| 9 C9   | -2.4348 | -4.1634 | -5.3716 C |
| 10 C10 | -4.4167 | -2.7713 | -5.3743 C |
| 11 C11 | -2.8987 | -4.8237 | -6.5078 C |
| 12 H12 | -1.4897 | -4.4426 | -4.9274 H |
| 13 C13 | -4.8784 | -3.4332 | -6.5105 C |
| 14 H14 | -5.0008 | -1.9764 | -4.9322 H |
| 15 C15 | -4.1289 | -4.4717 | -7.0990 C |
| 16 I16 | -6.7093 | -2.7918 | -7.2551 I |
| 17 I17 | -4.8166 | -5.4540 | -8.7870 I |
| 18 I18 | -1.6729 | -6.3294 | -7.2482 I |

@<TRIPOS>BOND

|             |
|-------------|
| 1 1 2 1     |
| 2 1 3 1     |
| 3 1 4 1     |
| 4 1 5 1     |
| 5 6 7 3     |
| 6 7 8 Ar    |
| 7 8 9 Ar    |
| 8 8 10 Ar   |
| 9 9 11 Ar   |
| 10 9 12 1   |
| 11 10 13 Ar |
| 12 10 14 1  |
| 13 11 15 Ar |
| 14 11 18 1  |



15 13 15 Ar

16 13 16 1

17 15 17 1

F-C-F<sub>3</sub>...NC-C<sub>6</sub>H<sub>2</sub>-Cl<sub>3</sub>

Molecule Name

18 17

SMALL

NO\_CHARGES

@<TRIPOS>ATOM

|         |         |         |            |
|---------|---------|---------|------------|
| 1 C1    | -1.2101 | -0.3158 | 0.0261 C   |
| 2 F2    | -0.7671 | 0.3111  | -1.0468 F  |
| 3 F3    | -0.7654 | -1.5578 | 0.0359 F   |
| 4 F4    | -0.7667 | 0.3115  | 1.1084 F   |
| 5 F5    | -2.5293 | -0.3112 | 0.0361 F   |
| 6 N6    | -2.3248 | -1.8927 | -2.6881 N  |
| 7 C7    | -2.7154 | -2.4451 | -3.6474 C  |
| 8 C8    | -3.1905 | -3.1175 | -4.8159 C  |
| 9 C9    | -2.4288 | -4.1427 | -5.3804 C  |
| 10 C10  | -4.4112 | -2.7420 | -5.3804 C  |
| 11 C11  | -2.8964 | -4.7925 | -6.5166 C  |
| 12 H12  | -1.4837 | -4.4350 | -4.9451 H  |
| 13 C13  | -4.8674 | -3.3999 | -6.5166 C  |
| 14 H14  | -5.0024 | -1.9488 | -4.9452 H  |
| 15 C15  | -4.1200 | -4.4332 | -7.1022 C  |
| 16 Cl16 | -6.3723 | -2.9238 | -7.1973 Cl |
| 17 Cl17 | -4.6882 | -5.2375 | -8.5000 Cl |
| 18 Cl18 | -1.9450 | -6.0520 | -7.1971 Cl |

@<TRIPOS>BOND

1 1 2 1

2 1 3 1

3 1 4 1

4 1 5 1

5 6 7 3

6 7 8 Ar

7 8 9 Ar

8 8 10 Ar

9 9 11 Ar

10 9 12 1

11 10 13 Ar

12 10 14 1

13 11 15 Ar

14 11 18 1

15 13 15 Ar

16 13 16 1

17 15 17 1

F-C-F<sub>3</sub>...NC-C<sub>6</sub>H<sub>2</sub>-Br<sub>3</sub>

Molecule Name

18 17

SMALL

NO\_CHARGES

@<TRIPOS>ATOM

|         |         |         |            |
|---------|---------|---------|------------|
| 1 C1    | -1.2280 | -0.3305 | -0.0099 C  |
| 2 F2    | -0.7938 | 0.2992  | -1.0847 F  |
| 3 F3    | -0.7723 | -1.5685 | 0.0000 F   |
| 4 F4    | -0.7865 | 0.3019  | 1.0704 F   |
| 5 F5    | -2.5471 | -0.3373 | 0.0045 F   |
| 6 N6    | -2.3306 | -1.9089 | -2.7037 N  |
| 7 C7    | -2.7201 | -2.4642 | -3.6617 C  |
| 8 C8    | -3.1943 | -3.1400 | -4.8281 C  |
| 9 C9    | -2.4275 | -4.1580 | -5.3974 C  |
| 10 C10  | -4.4202 | -2.7761 | -5.3879 C  |
| 11 C11  | -2.8939 | -4.8124 | -6.5326 C  |
| 12 H12  | -1.4784 | -4.4397 | -4.9637 H  |
| 13 C13  | -4.8768 | -3.4372 | -6.5232 C  |
| 14 H14  | -5.0138 | -1.9879 | -4.9469 H  |
| 15 C15  | -4.1239 | -4.4647 | -7.1147 C  |
| 16 Br16 | -6.5234 | -2.9091 | -7.2290 Br |
| 17 Br17 | -4.7408 | -5.3439 | -8.6321 Br |
| 18 Br18 | -1.8267 | -6.1662 | -7.2514 Br |

@<TRIPOS>BOND

1 1 2 1

2 1 3 1

3 1 4 1

4 1 5 1

5 6 7 3

6 7 8 Ar

7 8 9 Ar

8 8 10 Ar

9 9 11 Ar

10 9 12 1

11 10 13 Ar

12 10 14 1

13 11 15 Ar

14 11 18 1

15 13 15 Ar

16 13 16 1

17 15 17 1

F-C-F<sub>3</sub>...NC-C<sub>6</sub>H<sub>2</sub>-I<sub>3</sub>

Molecule Name

18 17

SMALL

NO\_CHARGES

@<TRIPOS>ATOM

|        |         |         |           |
|--------|---------|---------|-----------|
| 1 C1   | -1.2167 | -0.3117 | 0.0109 C  |
| 2 F2   | -0.7776 | 0.3101  | -1.0665 F |
| 3 F3   | -0.7685 | -1.5523 | 0.0273 F  |
| 4 F4   | -0.7726 | 0.3234  | 1.0886 F  |
| 5 F5   | -2.5358 | -0.3105 | 0.0238 F  |
| 6 N6   | -2.3306 | -1.9038 | -2.6864 N |
| 7 C7   | -2.7211 | -2.4609 | -3.6432 C |
| 8 C8   | -3.1957 | -3.1387 | -4.8082 C |
| 9 C9   | -2.4348 | -4.1634 | -5.3716 C |
| 10 C10 | -4.4167 | -2.7713 | -5.3743 C |
| 11 C11 | -2.8987 | -4.8237 | -6.5078 C |
| 12 H12 | -1.4897 | -4.4426 | -4.9274 H |
| 13 C13 | -4.8784 | -3.4332 | -6.5105 C |
| 14 H14 | -5.0008 | -1.9764 | -4.9322 H |
| 15 C15 | -4.1289 | -4.4717 | -7.0990 C |
| 16 I16 | -6.7093 | -2.7918 | -7.2551 I |
| 17 I17 | -4.8166 | -5.4540 | -8.7870 I |
| 18 I18 | -1.6729 | -6.3294 | -7.2482 I |

@<TRIPOS>BOND

|             |
|-------------|
| 1 1 2 1     |
| 2 1 3 1     |
| 3 1 4 1     |
| 4 1 5 1     |
| 5 6 7 3     |
| 6 7 8 Ar    |
| 7 8 9 Ar    |
| 8 8 10 Ar   |
| 9 9 11 Ar   |
| 10 9 12 1   |
| 11 10 13 Ar |
| 12 10 14 1  |
| 13 11 15 Ar |
| 14 11 18 1  |
| 15 13 15 Ar |
| 16 13 16 1  |

17 15 17 1

---

F-C-F<sub>3</sub>...NCF

Molecule Name

8 6

SMALL

NO\_CHARGES

@<TRIPOS>ATOM

|      |         |         |           |
|------|---------|---------|-----------|
| 1 C1 | -1.2066 | -0.3112 | 0.0383 C  |
| 2 F2 | -0.7627 | 0.3165  | -1.0341 F |
| 3 F3 | -0.7628 | -1.5538 | 0.0457 F  |
| 4 F4 | -0.7645 | 0.3140  | 1.1213 F  |
| 5 F5 | -2.5260 | -0.3069 | 0.0457 F  |
| 6 N6 | -2.3221 | -1.8887 | -2.6940 N |
| 7 C7 | -2.7125 | -2.4409 | -3.6505 C |
| 8 F8 | -3.1351 | -3.0385 | -4.6855 F |

@<TRIPOS>BOND

1 1 2 1  
2 1 3 1  
3 1 4 1  
4 1 5 1  
5 6 7 3  
6 7 8 1



---

F-C-F<sub>3</sub>...NCCl

Molecule Name

8 6

SMALL

NO\_CHARGES

@<TRIPOS>ATOM

|       |         |         |            |
|-------|---------|---------|------------|
| 1 C1  | -1.2092 | -0.3149 | 0.0319 C   |
| 2 F2  | -0.7651 | 0.3132  | -1.0400 F  |
| 3 F3  | -0.7651 | -1.5572 | 0.0399 F   |
| 4 F4  | -0.7668 | 0.3107  | 1.1153 F   |
| 5 F5  | -2.5284 | -0.3102 | 0.0399 F   |
| 6 N6  | -2.3224 | -1.8892 | -2.6948 N  |
| 7 C7  | -2.7141 | -2.4431 | -3.6543 C  |
| 8 Cl8 | -3.2578 | -3.2119 | -4.9858 Cl |

@<TRIPOS>BOND

1 1 2 1  
2 1 3 1  
3 1 4 1  
4 1 5 1  
5 6 7 3  
6 7 8 1

---

F-C-F<sub>3</sub>...NCBr

Molecule Name

8 6

SMALL

NO\_CHARGES

@<TRIPOS>ATOM

|       |         |         |            |
|-------|---------|---------|------------|
| 1 C1  | -1.2138 | -0.3214 | 0.0208 C   |
| 2 F2  | -0.7694 | 0.3071  | -1.0506 F  |
| 3 F3  | -0.7694 | -1.5635 | 0.0293 F   |
| 4 F4  | -0.7714 | 0.3042  | 1.1046 F   |
| 5 F5  | -2.5330 | -0.3164 | 0.0293 F   |
| 6 N6  | -2.3155 | -1.8793 | -2.6780 N  |
| 7 C7  | -2.7073 | -2.4335 | -3.6378 C  |
| 8 Br8 | -3.2992 | -3.2707 | -5.0878 Br |

@<TRIPOS>BOND

|         |
|---------|
| 1 1 2 1 |
| 2 1 3 1 |
| 3 1 4 1 |
| 4 1 5 1 |
| 5 6 7 3 |
| 6 7 8 1 |

---

F-C-F<sub>3</sub>...NCI

Molecule Name

8 6

SMALL

NO\_CHARGES

@&lt;TRIPOS&gt;ATOM

|      |         |         |           |
|------|---------|---------|-----------|
| 1 C1 | -1.2134 | -0.3208 | 0.0217 C  |
| 2 F2 | -0.7689 | 0.3078  | -1.0495 F |
| 3 F3 | -0.7689 | -1.5628 | 0.0305 F  |
| 4 F4 | -0.7708 | 0.3050  | 1.1056 F  |
| 5 F5 | -2.5325 | -0.3157 | 0.0305 F  |
| 6 N6 | -2.3143 | -1.8778 | -2.6751 N |
| 7 C7 | -2.7065 | -2.4325 | -3.6358 C |
| 8 I8 | -3.3670 | -3.3662 | -5.2534 I |

@&lt;TRIPOS&gt;BOND

|         |
|---------|
| 1 1 2 1 |
| 2 1 3 1 |
| 3 1 4 1 |
| 4 1 5 1 |
| 5 6 7 3 |
| 6 7 8 1 |

## For Set II Complexes (W-Effect)

Cl-C-F<sub>3</sub>...NC-C<sub>6</sub>H<sub>2</sub>-F<sub>3</sub>

Molecule Name

18 17

SMALL

NO\_CHARGES

@&lt;TRIPOS&gt;ATOM

|        |         |         |           |
|--------|---------|---------|-----------|
| 1 C1   | 5.3919  | 1.7202  | 8.7388 C  |
| 2 F2   | 5.0848  | 0.7658  | 9.6044 F  |
| 3 Cl3  | 6.5818  | 2.8085  | 9.4453 Cl |
| 4 F4   | 4.2940  | 2.3935  | 8.4293 F  |
| 5 F5   | 5.8843  | 1.1666  | 7.6409 F  |
| 6 C6   | -0.5329 | -3.6603 | 5.1880 C  |
| 7 C7   | 0.7193  | -4.1376 | 5.5647 C  |
| 8 C8   | 1.6681  | -3.3022 | 6.1268 C  |
| 9 C9   | 1.3469  | -1.9539 | 6.3135 C  |
| 10 C10 | 0.0960  | -1.4495 | 5.9436 C  |
| 11 C11 | -0.8280 | -2.3142 | 5.3844 C  |
| 12 H12 | 2.6323  | -3.6989 | 6.4101 H  |
| 13 H13 | -0.1593 | -0.4093 | 6.0848 H  |
| 14 F14 | -2.0312 | -1.8714 | 5.0188 F  |
| 15 F15 | -1.4316 | -4.4761 | 4.6499 F  |
| 16 F16 | 0.9877  | -5.4291 | 5.3706 F  |
| 17 C17 | 2.3144  | -1.0755 | 6.8929 C  |
| 18 N18 | 3.1087  | -0.3541 | 7.3686 N  |

@&lt;TRIPOS&gt;BOND

1 1 2 1  
 2 1 3 1  
 3 1 4 1  
 4 1 5 1  
 5 6 7 Ar  
 6 6 11 Ar  
 7 6 15 1  
 8 7 8 2  
 9 7 16 1  
 10 8 9 Ar  
 11 8 12 1  
 12 9 10 Ar  
 13 9 17 Ar  
 14 10 11 2

15 10 13 1

16 11 14 1

17 17 18 3

Br-C-F<sub>3</sub>...NC-C<sub>6</sub>H<sub>2</sub>-F<sub>3</sub>

Molecule Name

18 17

SMALL

NO\_CHARGES

@<TRIPOS>ATOM

|        |         |         |           |
|--------|---------|---------|-----------|
| 1 C1   | 4.1438  | 2.9793  | 3.7664 C  |
| 2 F2   | 4.9925  | 2.0347  | 3.3890 F  |
| 3 F3   | 2.9816  | 2.4216  | 4.0712 F  |
| 4 F4   | 3.9679  | 3.8293  | 2.7658 F  |
| 5 Br5  | 4.8407  | 3.9077  | 5.2942 Br |
| 6 N6   | 2.9259  | 1.3528  | 1.0922 N  |
| 7 C7   | 2.5004  | 0.7841  | 0.1576 C  |
| 8 C8   | 1.9824  | 0.0915  | -0.9805 C |
| 9 C9   | 2.7232  | -0.9516 | -1.5454 C |
| 10 C10 | 0.7439  | 0.4691  | -1.5091 C |
| 11 C11 | 2.2063  | -1.6107 | -2.6465 C |
| 12 H12 | 3.6806  | -1.2489 | -1.1425 H |
| 13 C13 | 0.2582  | -0.2124 | -2.6108 C |
| 14 H14 | 0.1661  | 1.2738  | -1.0781 H |
| 15 C15 | 0.9761  | -1.2541 | -3.1916 C |
| 16 F16 | -0.9184 | 0.1180  | -3.1437 F |
| 17 F17 | 0.4950  | -1.8974 | -4.2486 F |
| 18 F18 | 2.8825  | -2.6103 | -3.2133 F |

@<TRIPOS>BOND

1 1 2 1  
 2 1 3 1  
 3 1 4 1  
 4 1 5 1  
 5 6 7 3  
 6 7 8 Ar  
 7 8 9 Ar  
 8 8 10 Ar  
 9 9 11 2  
 10 9 12 1  
 11 10 13 2  
 12 10 14 1  
 13 11 15 Ar  
 14 11 18 1  
 15 13 15 Ar  
 16 13 16 1

17 15 17 1

I-C-F<sub>3</sub>...NC-C<sub>6</sub>H<sub>2</sub>-F<sub>3</sub>

Molecule Name

18 17

SMALL

NO\_CHARGES

@<TRIPOS>ATOM

|        |         |         |           |
|--------|---------|---------|-----------|
| 1 C1   | 2.9819  | 2.1457  | 2.7043 C  |
| 2 F2   | 3.8524  | 1.2186  | 2.3239 F  |
| 3 F3   | 1.8110  | 1.5655  | 2.9371 F  |
| 4 F4   | 2.8368  | 3.0270  | 1.7224 F  |
| 5 I5   | 3.6797  | 3.1258  | 4.4726 I  |
| 6 N6   | 1.8859  | 0.6036  | -0.0764 N |
| 7 C7   | 1.5045  | 0.0645  | -1.0469 C |
| 8 C8   | 1.0402  | -0.5922 | -2.2286 C |
| 9 C9   | 1.8136  | -1.6087 | -2.7983 C |
| 10 C10 | -0.1793 | -0.2068 | -2.7945 C |
| 11 C11 | 1.3486  | -2.2332 | -3.9419 C |
| 12 H12 | 2.7566  | -1.9118 | -2.3668 H |
| 13 C13 | -0.6129 | -0.8534 | -3.9381 C |
| 14 H14 | -0.7821 | 0.5775  | -2.3600 H |
| 15 C15 | 0.1383  | -1.8681 | -4.5245 C |
| 16 F16 | -1.7700 | -0.5145 | -4.5072 F |
| 17 F17 | -0.2929 | -2.4781 | -5.6221 F |
| 18 F18 | 2.0572  | -3.2067 | -4.5146 F |

@<TRIPOS>BOND

1 1 2 1  
 2 1 3 1  
 3 1 4 1  
 4 1 5 1  
 5 6 7 3  
 6 7 8 Ar  
 7 8 9 Ar  
 8 8 10 Ar  
 9 9 11 2  
 10 9 12 1  
 11 10 13 2  
 12 10 14 1  
 13 11 15 Ar  
 14 11 18 1  
 15 13 15 Ar  
 16 13 16 1



17 15 17 1

---

Cl-C-F<sub>3</sub>...NCF

Molecule Name

8 6

SMALL

NO\_CHARGES

@<TRIPOS>ATOM

|       |         |        |            |
|-------|---------|--------|------------|
| 1 C1  | -0.9415 | 1.7501 | -0.1572 C  |
| 2 F2  | -1.4191 | 2.9769 | -0.3053 F  |
| 3 F3  | -1.4300 | 0.9780 | -1.1165 F  |
| 4 F4  | -1.3279 | 1.2754 | 1.0178 F   |
| 5 Cl5 | 0.8155  | 1.7761 | -0.2449 Cl |
| 6 N6  | -4.3260 | 1.7000 | 0.0117 N   |
| 7 C7  | -5.4959 | 1.6827 | 0.0701 C   |
| 8 F8  | -6.7621 | 1.6644 | 0.1333 F   |

@<TRIPOS>BOND

1 1 2 1  
2 1 3 1  
3 1 4 1  
4 1 5 1  
5 6 7 3  
6 7 8 1

---

Br-C-F<sub>3</sub>...NCF

Molecule Name

8 6

SMALL

NO\_CHARGES

@<TRIPOS>ATOM

|   |     |         |        |         |    |
|---|-----|---------|--------|---------|----|
| 1 | C1  | -0.7555 | 1.6511 | -0.1011 | C  |
| 2 | F2  | -1.1883 | 2.8932 | -0.2606 | F  |
| 3 | F3  | -1.2483 | 0.8937 | -1.0702 | F  |
| 4 | F4  | -1.1817 | 1.1913 | 1.0662  | F  |
| 5 | Br5 | 1.1608  | 1.6158 | -0.1559 | Br |
| 6 | N6  | -4.1309 | 1.7133 | -0.0045 | N  |
| 7 | C7  | -5.3017 | 1.7349 | 0.0290  | C  |
| 8 | F8  | -6.5688 | 1.7575 | 0.0653  | F  |

@<TRIPOS>BOND

|   |   |   |   |
|---|---|---|---|
| 1 | 1 | 2 | 1 |
| 2 | 1 | 3 | 1 |
| 3 | 1 | 4 | 1 |
| 4 | 1 | 5 | 1 |
| 5 | 6 | 7 | 3 |
| 6 | 7 | 8 | 1 |

---

I-C-F<sub>3</sub>...NCF

Molecule Name

8 6

SMALL

NO\_CHARGES

@<TRIPOS>ATOM

|      |         |        |           |
|------|---------|--------|-----------|
| 1 C1 | -3.1508 | 1.3673 | -0.0356 C |
| 2 F2 | -3.6807 | 2.5732 | -0.2020 F |
| 3 F3 | -3.5729 | 0.5757 | -1.0143 F |
| 4 F4 | -3.5674 | 0.8732 | 1.1242 F  |
| 5 I5 | -1.0168 | 1.4918 | -0.0584 I |
| 6 N6 | -6.5324 | 1.1697 | 0.0012 N  |
| 7 C7 | -7.7019 | 1.1015 | 0.0139 C  |
| 8 F8 | -8.9677 | 1.0278 | 0.0277 F  |

@<TRIPOS>BOND

1 1 2 1

2 1 3 1

3 1 4 1

4 1 5 1

5 6 7 3

6 7 8 1

For Set-II Complexes (X<sub>3</sub>-Effect)F-C-Cl<sub>3</sub>...NC-C<sub>6</sub>H<sub>2</sub>-F<sub>3</sub>

Molecule Name

18 17

SMALL

NO\_CHARGES

## @&lt;TRIPOS&gt;ATOM

|    |     |         |         |         |    |
|----|-----|---------|---------|---------|----|
| 1  | C1  | 1.8847  | 1.9057  | 3.4772  | C  |
| 2  | F2  | 2.2229  | 2.5755  | 4.5960  | F  |
| 3  | Cl3 | 2.5452  | 2.7750  | 2.0975  | Cl |
| 4  | Cl4 | 0.1293  | 1.8374  | 3.3885  | Cl |
| 5  | Cl5 | 2.5675  | 0.2878  | 3.5793  | Cl |
| 6  | N6  | 0.9914  | 0.1362  | 0.5240  | N  |
| 7  | C7  | 0.6965  | -0.4477 | -0.4513 | C  |
| 8  | C8  | 0.3380  | -1.1577 | -1.6388 | C  |
| 9  | C9  | -0.4159 | -2.3312 | -1.5362 | C  |
| 10 | C10 | 0.7474  | -0.6666 | -2.8827 | C  |
| 11 | C11 | -0.7537 | -3.0053 | -2.6962 | C  |
| 12 | H12 | -0.7357 | -2.7167 | -0.5789 | H  |
| 13 | C13 | 0.3912  | -1.3669 | -4.0215 | C  |
| 14 | H14 | 1.3299  | 0.2392  | -2.9699 | H  |
| 15 | C15 | -0.3586 | -2.5373 | -3.9462 | C  |
| 16 | F16 | 0.7625  | -0.9308 | -5.2254 | F  |
| 17 | F17 | -0.6916 | -3.1968 | -5.0493 | F  |
| 18 | F18 | -1.4714 | -4.1274 | -2.6397 | F  |

## @&lt;TRIPOS&gt;BOND

|    |    |    |    |
|----|----|----|----|
| 1  | 1  | 2  | 1  |
| 2  | 1  | 3  | 1  |
| 3  | 1  | 4  | 1  |
| 4  | 1  | 5  | 1  |
| 5  | 6  | 7  | 3  |
| 6  | 7  | 8  | Ar |
| 7  | 8  | 9  | Ar |
| 8  | 8  | 10 | Ar |
| 9  | 9  | 11 | 2  |
| 10 | 9  | 12 | 1  |
| 11 | 10 | 13 | 2  |
| 12 | 10 | 14 | 1  |
| 13 | 11 | 15 | Ar |
| 14 | 11 | 18 | 1  |
| 15 | 13 | 15 | Ar |

16 13 16 1

17 15 17 1

F-C-Br<sub>3</sub>...NC-C<sub>6</sub>H<sub>2</sub>-F<sub>3</sub>

Molecule Name

18 17

SMALL

NO\_CHARGES

@<TRIPOS>ATOM

|        |         |         |            |
|--------|---------|---------|------------|
| 1 C1   | -0.0000 | 0.0000  | 0.0000 C   |
| 2 F2   | -1.3447 | -0.0000 | -0.0000 F  |
| 3 Br3  | 0.6011  | 0.0000  | 1.8210 Br  |
| 4 Br4  | 0.6009  | 1.5773  | -0.9101 Br |
| 5 Br5  | 0.6006  | -1.5770 | -0.9108 Br |
| 6 C6   | 8.3941  | -1.0382 | -0.5997 C  |
| 7 C7   | 7.0108  | -1.0548 | -0.6092 C  |
| 8 C8   | 6.3236  | 0.0001  | -0.0000 C  |
| 9 C9   | 7.0107  | 1.0550  | 0.6091 C   |
| 10 C10 | 8.3940  | 1.0386  | 0.5995 C   |
| 11 C11 | 9.1010  | 0.0002  | -0.0001 C  |
| 12 H12 | 6.4870  | -1.8731 | -1.0818 H  |
| 13 H13 | 6.4868  | 1.8733  | 1.0816 H   |
| 14 C14 | 4.8937  | 0.0000  | 0.0000 C   |
| 15 N15 | 3.7200  | 0.0000  | 0.0000 N   |
| 16 F16 | 9.0847  | -2.0259 | -1.1700 F  |
| 17 F17 | 10.4289 | 0.0003  | -0.0001 F  |
| 18 F18 | 9.0845  | 2.0264  | 1.1699 F   |

@<TRIPOS>BOND

|            |
|------------|
| 1 1 2 1    |
| 2 1 3 1    |
| 3 1 4 1    |
| 4 1 5 1    |
| 5 6 7 1    |
| 6 6 11 1   |
| 7 6 16 1   |
| 8 7 8 1    |
| 9 7 12 1   |
| 10 8 9 1   |
| 11 8 14 1  |
| 12 9 10 1  |
| 13 9 13 1  |
| 14 10 11 1 |
| 15 10 18 1 |
| 16 11 17 1 |

17 14 15 1



F-C-I<sub>3</sub>...NC-C<sub>6</sub>H<sub>2</sub>-F<sub>3</sub>

Molecule Name

18 17

SMALL

NO\_CHARGES

@<TRIPOS>ATOM

|        |         |         |           |
|--------|---------|---------|-----------|
| 1 C1   | -0.0000 | 0.0000  | 0.0000 C  |
| 2 F2   | -1.3562 | -0.0000 | -0.0000 F |
| 3 I3   | 0.6571  | 0.0000  | 2.0380 I  |
| 4 I4   | 0.6572  | -1.7649 | -1.0191 I |
| 5 I5   | 0.6572  | 1.7650  | -1.0189 I |
| 6 C6   | 8.4241  | 0.0001  | -1.1990 C |
| 7 C7   | 7.0408  | 0.0001  | -1.2181 C |
| 8 C8   | 6.3536  | 0.0001  | 0.0000 C  |
| 9 C9   | 7.0407  | 0.0002  | 1.2182 C  |
| 10 C10 | 8.4240  | 0.0003  | 1.1992 C  |
| 11 C11 | 9.1310  | 0.0002  | 0.0001 C  |
| 12 H12 | 6.5170  | 0.0000  | -2.1630 H |
| 13 H13 | 6.5168  | 0.0002  | 2.1631 H  |
| 14 C14 | 4.9237  | -0.0000 | 0.0000 C  |
| 15 N15 | 3.7500  | -0.0000 | 0.0000 N  |
| 16 F16 | 9.1147  | 0.0001  | -2.3395 F |
| 17 F17 | 10.4589 | 0.0003  | 0.0002 F  |
| 18 F18 | 9.1145  | 0.0003  | 2.3398 F  |

@<TRIPOS>BOND

1 1 2 1  
 2 1 3 1  
 3 1 4 1  
 4 1 5 1  
 5 6 7 1  
 6 6 11 1  
 7 6 16 1  
 8 7 8 1  
 9 7 12 1  
 10 8 9 1  
 11 8 14 1  
 12 9 10 1  
 13 9 13 1  
 14 10 11 1  
 15 10 18 1  
 16 11 17 1

17 14 15 1

---

F-C-Cl<sub>3</sub>...NCF

Molecule Name

8 6

SMALL

NO\_CHARGES

@<TRIPOS>ATOM

|       |          |         |           |
|-------|----------|---------|-----------|
| 1 C1  | -25.3146 | 0.0329  | 2.3815 C  |
| 2 F2  | -23.9680 | 0.0268  | 2.4014 F  |
| 3 Cl3 | -25.8529 | 1.6908  | 2.1432 Cl |
| 4 Cl4 | -25.8490 | -0.9918 | 1.0551 Cl |
| 5 Cl5 | -25.8895 | -0.5927 | 3.9220 Cl |
| 6 N6  | -28.9097 | 0.0492  | 2.3281 N  |
| 7 C7  | -30.0818 | 0.0546  | 2.3107 C  |
| 8 F8  | -31.3496 | 0.0604  | 2.2918 F  |

@<TRIPOS>BOND

|         |
|---------|
| 1 1 2 1 |
| 2 1 3 1 |
| 3 1 4 1 |
| 4 1 5 1 |
| 5 6 7 3 |
| 6 7 8 1 |

---

F-C-Br<sub>3</sub>...NCF

Molecule Name

8 6

SMALL

NO\_CHARGES

@&lt;TRIPOS&gt;ATOM

|       |          |         |            |
|-------|----------|---------|------------|
| 1 C1  | -10.6860 | -0.1171 | 1.1796 C   |
| 2 F2  | -9.3406  | -0.1298 | 1.0908 F   |
| 3 Br3 | -11.2372 | -1.7532 | 2.0107 Br  |
| 4 Br4 | -11.3925 | 0.0224  | -0.5960 Br |
| 5 Br5 | -11.1925 | 1.3959  | 2.2404 Br  |
| 6 N6  | -14.2439 | -0.0838 | 1.4143 N   |
| 7 C7  | -15.4138 | -0.0730 | 1.4914 C   |
| 8 F8  | -16.6791 | -0.0614 | 1.5757 F   |

@&lt;TRIPOS&gt;BOND

|         |
|---------|
| 1 1 2 1 |
| 2 1 3 1 |
| 3 1 4 1 |
| 4 1 5 1 |
| 5 6 7 3 |
| 6 7 8 1 |

---

F-C-I<sub>3</sub>...NCF

Molecule Name

8 6

SMALL

NO\_CHARGES

@&lt;TRIPOS&gt;ATOM

|   |    |          |         |        |   |
|---|----|----------|---------|--------|---|
| 1 | C1 | -24.8447 | -0.1174 | 2.2723 | C |
| 2 | F2 | -23.4882 | -0.1891 | 2.2534 | F |
| 3 | I3 | -25.5704 | -1.3357 | 0.6688 | I |
| 4 | I4 | -25.3787 | 1.9376  | 2.0009 | I |
| 5 | I5 | -25.4959 | -0.8532 | 4.1741 | I |
| 6 | N6 | -28.4190 | 0.0718  | 2.3219 | N |
| 7 | C7 | -29.5900 | 0.1337  | 2.3380 | C |
| 8 | F8 | -30.8560 | 0.2008  | 2.3554 | F |

@&lt;TRIPOS&gt;BOND

|   |   |   |   |
|---|---|---|---|
| 1 | 1 | 2 | 1 |
| 2 | 1 | 3 | 1 |
| 3 | 1 | 4 | 1 |
| 4 | 1 | 5 | 1 |
| 5 | 6 | 7 | 3 |
| 6 | 7 | 8 | 1 |
